# Supplementary material
Source: PubMed Central journal article supplement (PMC3818123)

**IL-22 activates oxidant signaling in pulmonary vascular smooth muscle cells**

Geetanjali Bansal<sup>§</sup>, Dividutta Das<sup>§</sup>, Cheng-Ying Hsieh, Yi-Hsuan Wang,  
Brent A. Gilmore, Chi-Ming Wong and Yuichiro J. Suzuki\*

Department of Pharmacology and Physiology  
Georgetown University Medical Center  
Washington DC 20057

<sup>§</sup>These authors contributed equally to this project.

**\*To whom correspondence should be addressed:**

Dr. Yuichiro J. Suzuki  
Department of Pharmacology and Physiology  
Georgetown University Medical Center  
3900 Reservoir Road NW  
Washington, DC 20057 USA  
TEL: (202) 687-8090  
FAX: (202) 687-8825  
e-mail: ys82@georgetown.edu

**Supplemental Figure: Identifications of carbonylated proteins in response to IL-22.** Human pulmonary artery SMCs were treated with IL-22 (10 ng/ml) for 10 or 30 min. Cell lysates were derivatized with DNPH, subjected to 2-dimensional gel electrophoresis, followed by immunoblotting. Corresponding Coomassie Blue stained spots were analyzed by mass spectrometry as described previously (Wong et al., 2008). Bar graphs represent means  $\pm$  SEM of carbonyl contents of carbonylated protein spots (CPS). CPS numbers are indicated in representative carbonyl immunoblots and Coomassie Blue stained gels. \* denotes values significantly different from untreated control at  $P < 0.05$ . See the main text for identities of proteins that are carbonylated in response to IL-22 treatment.

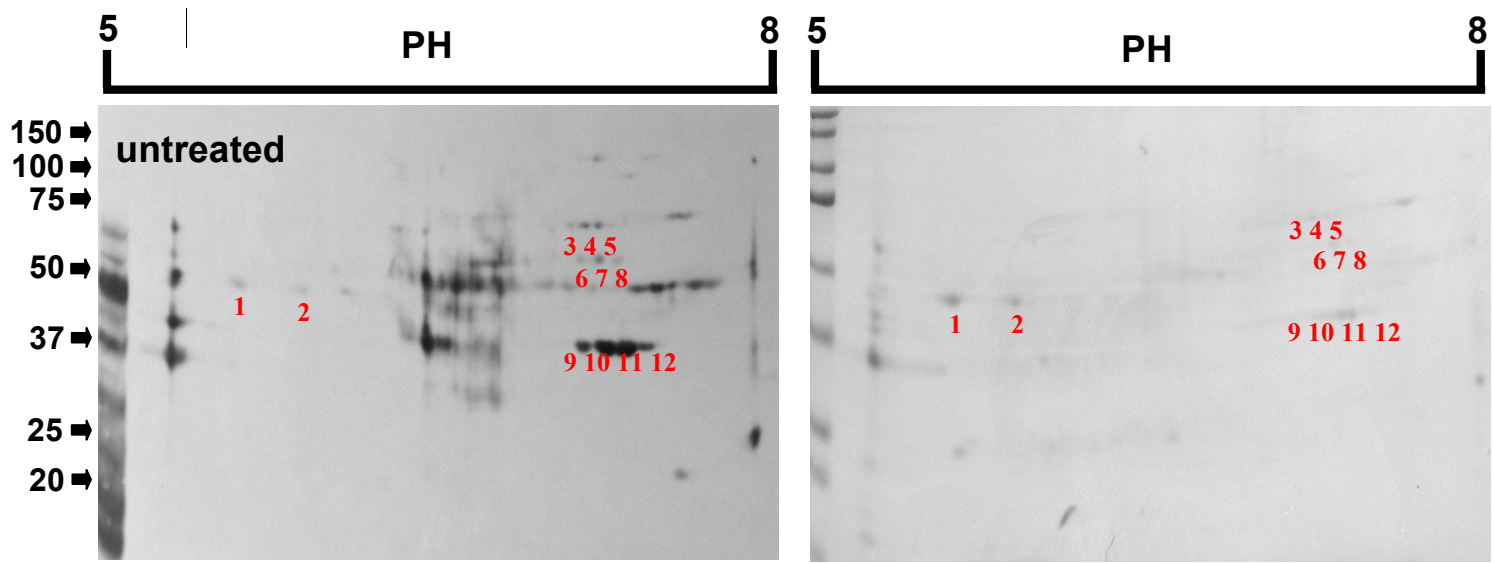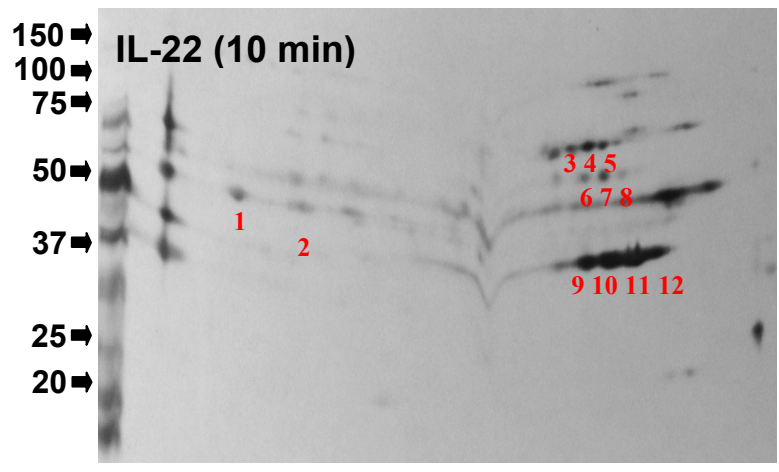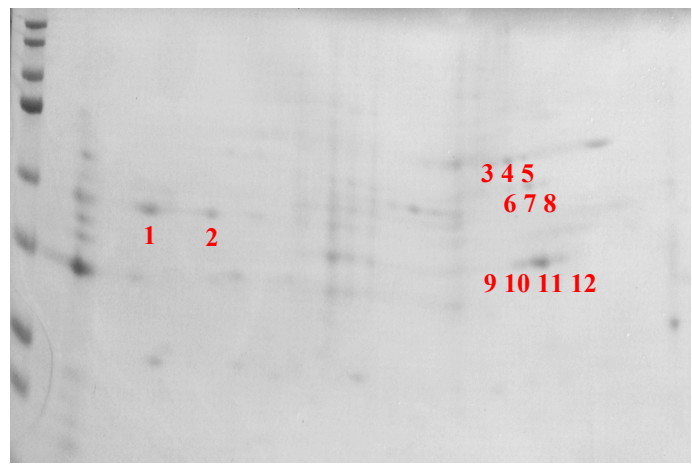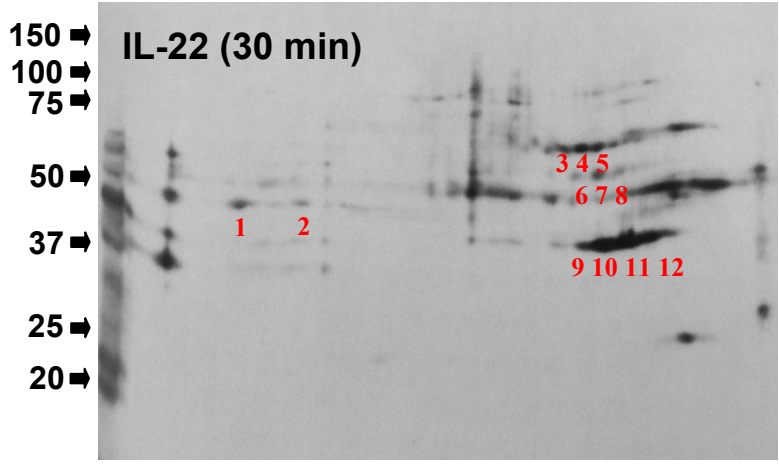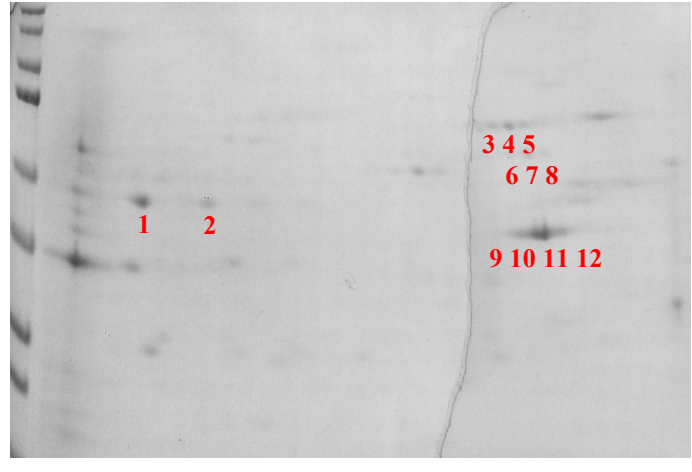

**Carbonyl immunoblots**

**Coomassie blue stained gels**

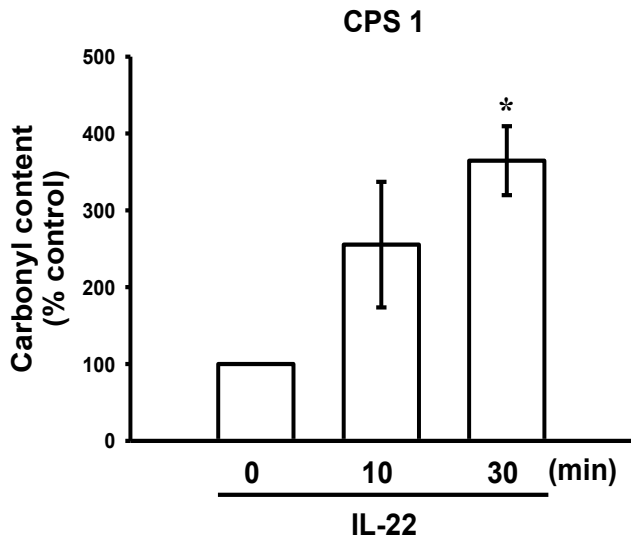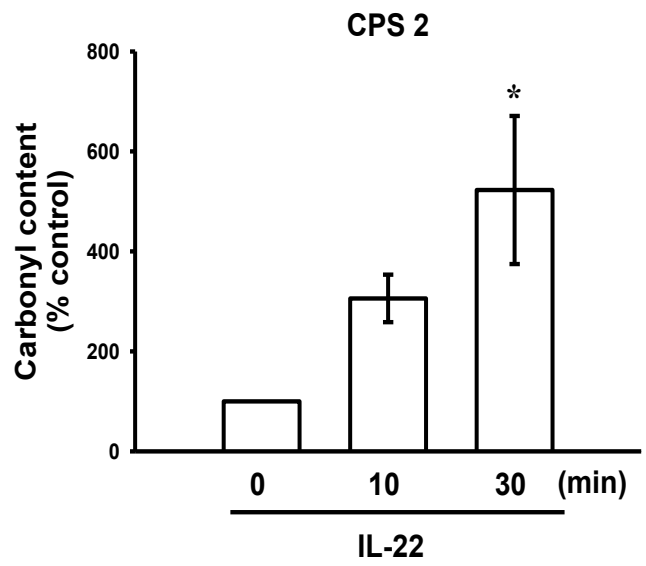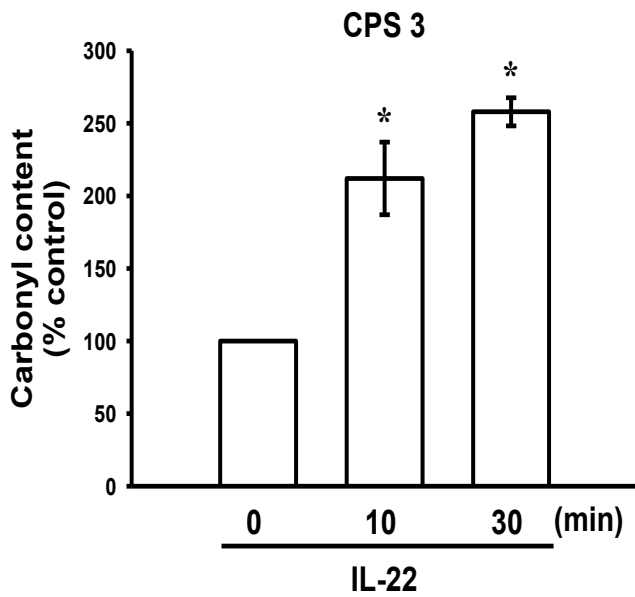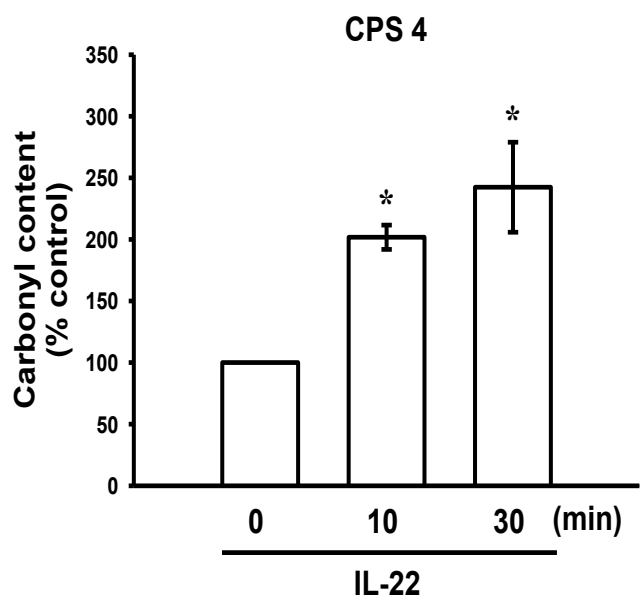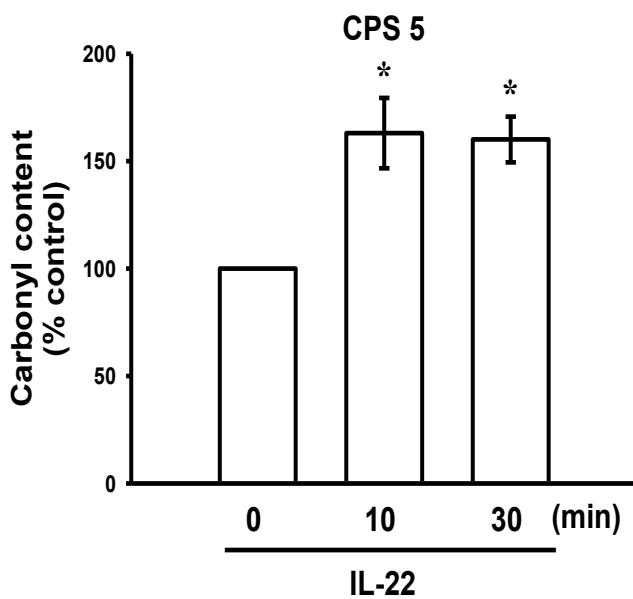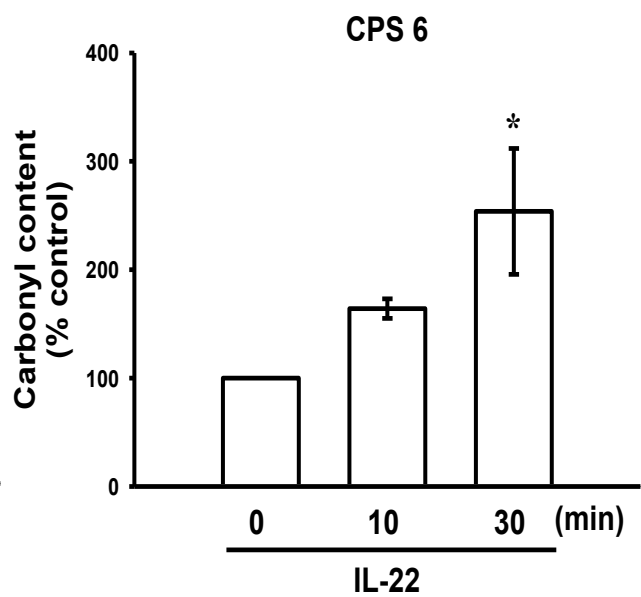

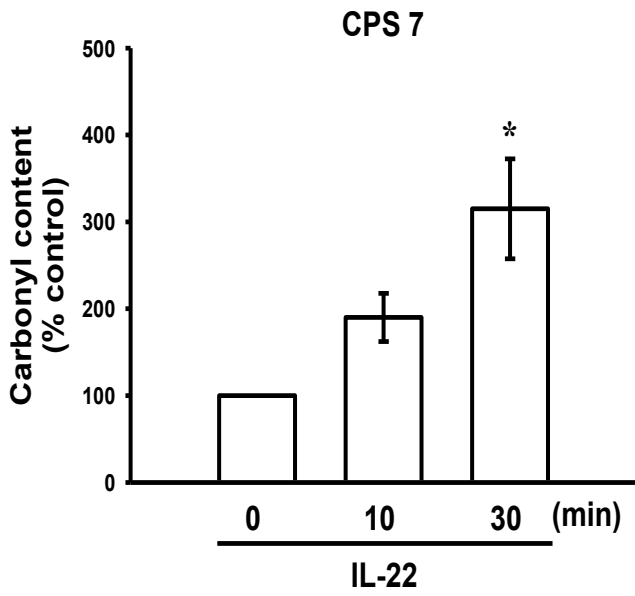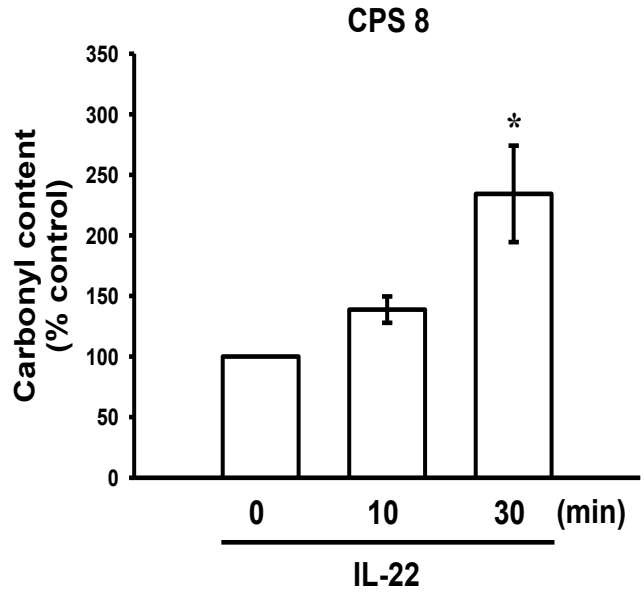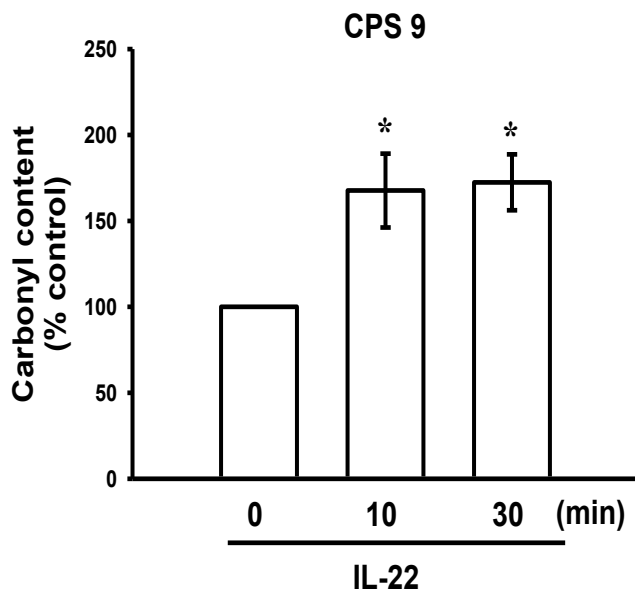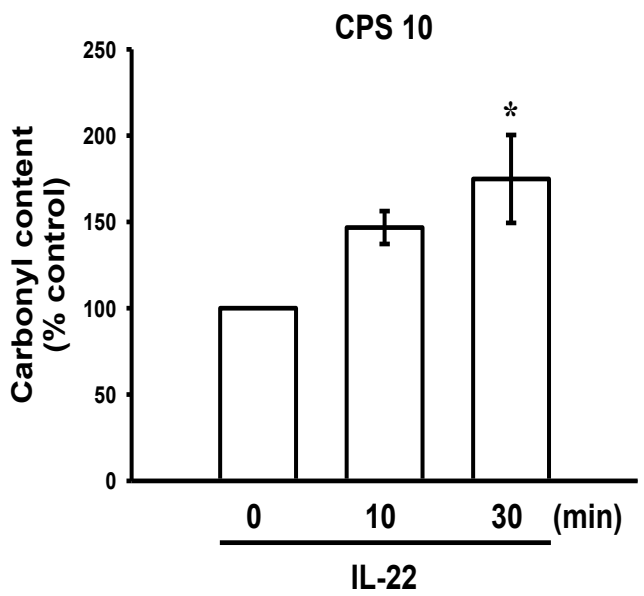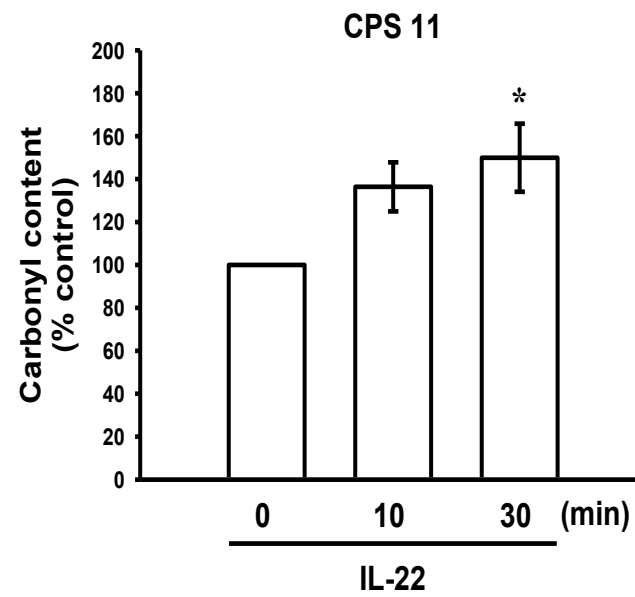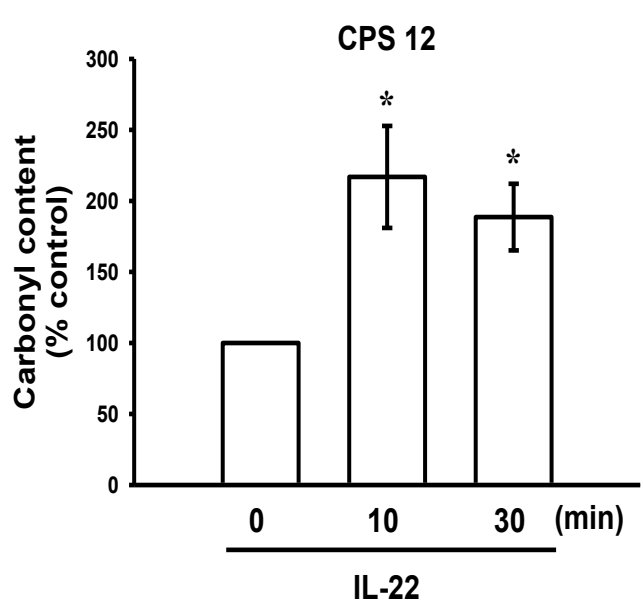

Supplement: NIHMS524055-supplement-01.pdf [file NIHMS524055-supplement-01.pdf]
